# Supplementary material for: “We’re All in the Same Boat” – The Experience of People With Mental Health Conditions and Non-clinical Community Members in Integrated Arts-Based Groups
Source: PubMed Central journal article supplement (PMC8010183; doi:10.3389/fpsyg.2021.661831), 2021-03-17
Supplement: Data_Sheet_1.pdf [file Data_Sheet_1.pdf]

**“We’re All in the Same Boat” – the Experience of People  
with Mental Health Conditions and Non-Clinical Community Members in  
Integrated Arts-Based Groups**

Aya Nitzan & Hod Orkibi (2021)

**Online Supplemental Material**

**Table S1.**

*Focus Groups Participant*

| <b>Participant's number and pseudonym</b> | <b>Age</b> | <b>Gender</b> | <b>Group</b>           | <b>Participant status</b>     |
|-------------------------------------------|------------|---------------|------------------------|-------------------------------|
| 1. Sheila                                 | 48         | F             | Singing Group          | Participant with MHC          |
| 2. James                                  | 46         | M             | Singing Group          | Participant with MHC          |
| 3. Kevin                                  | 28         | M             | Singing Group          | Participant with MHC          |
| 4. Maria                                  | 33         | F             | Theater Group          | Participant with MHC          |
| 5. Nina                                   | 28         | F             | Theater Group          | Participant with MHC          |
| 6. Emily                                  | 56         | F             | Theater Group          | Participant with MHC          |
| 7. Sofia                                  | 22         | F             | Theater Group          | Participant with MHC          |
| 8. Ella                                   | 21         | F             | Music Group            | Participant with MHC          |
| 9. Lily                                   | 37         | F             | Music Group            | Participant with MHC          |
| 10. David                                 | 26         | M             | Music Group            | Participant with MHC          |
| 11. John                                  | 23         | M             | Music Group            | Participant with MHC          |
| 12. Claire                                | 46         | F             | Writing Group          | Participant with MHC          |
| 13. Anna                                  | 38         | F             | Writing Group          | Participant with MHC          |
| 14. Julia                                 | 53         | F             | Writing Group          | Participant with MHC          |
| 15. Liliana                               | 26         | F             | Playback Theater Group | Participant with MHC          |
| 16. Natalia                               | 53         | F             | Playback Theater Group | Participant with MHC          |
| 17. Adam                                  | 33         | M             | Playback Theater Group | Participant with MHC          |
| 18. Faith                                 | 67         | F             | Singing Group          | Non-clinical community member |

| <b>Participant's number and pseudonym</b> | <b>Age</b> | <b>Gender</b> | <b>Group</b>           | <b>Participant status</b>     |
|-------------------------------------------|------------|---------------|------------------------|-------------------------------|
| 19. Dan                                   | 29         | M             | Singing Group          | Non-clinical community member |
| 20. Mali                                  | 26         | F             | Theater Group          | Non-clinical community member |
| 21. Jessica                               | 26         | F             | Theater Group          | Non-clinical community member |
| 22. Lora                                  | 25         | F             | Theater Group          | Non-clinical community member |
| 23. Jack                                  | 33         | M             | Theater Group          | Non-clinical community member |
| 24. Bill                                  | 25         | M             | Theater Group          | Non-clinical community member |
| 25. Ruth                                  | 22         | F             | Music Group            | Non-clinical community member |
| 26. Vera                                  | 39         | F             | Music Group            | Non-clinical community member |
| 27. Kate                                  | 25         | F             | Music Group            | Non-clinical community member |
| 28. Carl                                  | 23         | M             | Music Group            | Non-clinical community member |
| 29. Peter                                 | 26         | M             | Music Group            | Non-clinical community member |
| 30. Diana                                 | 72         | F             | Writing Group          | Non-clinical community member |
| 31. Selina                                | 60         | F             | Writing Group          | Non-clinical community member |
| 32. Nancy                                 | 55         | F             | Writing Group          | Non-clinical community member |
| 33. Fred                                  | 57         | M             | Writing Group          | Non-clinical community member |
| 34. Isabella                              | 45         | F             | Playback Theater Group | Non-clinical community member |
| 35. Ellison                               | 41         | F             | Playback Theater Group | Non-clinical community member |
| 36. Camilla                               | 70         | F             | Playback Theater Group | Non-clinical community member |
| 37. Talia                                 | 66         | F             | Playback Theater Group | Non-clinical community member |
| 38. George                                | 59         | M             | Playback Theater Group | Non-clinical community member |

*Note.* MHC = mental health condition; NCM = non-clinical community members.

**Table S2**

*Focus Group Interview Protocol*

1. How did you get into the *Amitim* program? (through personal connection, volunteering).
2. Do you participate in more *Amitim* programs' activities?
3. What led you participating in the integrated group, and why did you choose this art medium? (theater / singing / music/ writing/playback)
4. What do you think is the unique contribution of the arts?
5. What can you say about the discourse on mental health in the group? Was this discourse reflected in the art works, and how?
6. Would you prefer the group participants to know who is from *Amitim* and who is not, or to remain anonymous, and why?
7. How did you experience the group facilitator?
8. What was the most meaningful experience for you?
9. What could you recommend for improvement or change?
10. Is there anything else you would like to address?
